# Supplementary material for: Study on NGF and VEGF during the Equine Perinatal Period—Part 2: Foals Affected by Neonatal Encephalopathy
Source: MDPI journal article supplement (doi:10.3390/vetsci9090459), 2022-08-26
Supplement: s1 [file s1]

**Table S1.** Foals complete blood cell counts, serum biochemistry, electrolyte concentrations, rapid determinations and arterial blood gas analysis at birth (group NE) or at admission (group exNE). Data are expressed as mean  $\pm$  standard deviation (min-max). For normal values refer to [34], [35], [36], [37], and [38].

[34] Harvey, J.W. Normal hematological values. In *Equine Clinical Neonatology*; Koterba, A.M., Drummond, W.H., Kosch, P.C., Eds.; Lea and Febiger: Philadelphia, 1990; pp. 561-570.

[35] Bauer, J.E.; Harvey, J.W.; Asquith, R.L.; McNulty, P.K.; Kivipelto, J.A.N. Clinical chemistry reference values of foals during the first year of life. *Equine Vet J* **1984**, *16*, 361-363.

[36] Stoneham, S.J.; Palmer, L.; Cash, R.; Rosedale, P.D. Measurement of serum amyloid A in the neonatal foal using a latex agglutination immunoturbidimetric assay: determination of the normal range, variation with age and response to disease. *Equine Vet J* **2001**, *33*, 599-603.

[37] Pirrone, A.; Mariella, J.; Gentilini, F.; Castagnetti, C. Amniotic fluid and blood lactate concentrations in mares and foals in the early postpartum period. *Theriogenology* **2012**, *78*, 1182-1189.

[38] Aguilera-Tejero, E.; Estepa, J.C.; Lopez, I.; Mayer-Valor, R.; Rodriguez, M. Arterial blood gases and acid-base balance in healthy young and aged horses. *Equine Vet J* **1998**, *30*, 352-354.

| Haematology                                                    |                               |                                     |                                  |                                   |                                    |                                 |                                    |                            |                              |
|----------------------------------------------------------------|-------------------------------|-------------------------------------|----------------------------------|-----------------------------------|------------------------------------|---------------------------------|------------------------------------|----------------------------|------------------------------|
| Haemoglobin<br>g/dL                                            | Haematocrit<br>%              | Erythrocytes<br>10 <sup>6</sup> /μL | Platelets<br>10 <sup>3</sup> /μL | Leucocytes<br>10 <sup>3</sup> /μL | Lymphocytes<br>10 <sup>3</sup> /μL | Monocytes<br>cells/μL           | Neutrophils<br>10 <sup>3</sup> /μL | Eosinophils<br>cells/μL    | Basophils<br>cells/μL        |
| group NE                                                       |                               |                                     |                                  |                                   |                                    |                                 |                                    |                            |                              |
| 15.4 $\pm$ 1.7<br>(12.3-19.8)                                  | 48.0 $\pm$ 4.3<br>(40.2-58.4) | 10.5 $\pm$ 0.9<br>(8.9-12.9)        | 180.6 $\pm$ 28.6<br>(137-242)    | 7.5 $\pm$ 2.0<br>(4.6-12.3)       | 1.5 $\pm$ 0.4<br>(0.8-2.2)         | 150.8 $\pm$ 87.5<br>(30-280)    | 5.8 $\pm$ 2.1<br>(2.5-10.7)        | 23.6 $\pm$ 25.8<br>(10-80) | 90.8 $\pm$ 127.6<br>(10-380) |
| group exNE                                                     |                               |                                     |                                  |                                   |                                    |                                 |                                    |                            |                              |
| 14.0 $\pm$ 2.8<br>(7.5-18.9)                                   | 42.4 $\pm$ 8.3<br>(22.4-55.3) | 9.8 $\pm$ 1.8<br>(5.0-12.6)         | 175.3 $\pm$ 61.8<br>(61-276)     | 7.7 $\pm$ 4.2<br>(0.6-13.9)       | 1.2 $\pm$ 0.8<br>(0.1-3.2)         | 106.5 $\pm$ 73.4<br>(10-260)    | 6.3 $\pm$ 4.4<br>(0.5-12.8)        | 12.5 $\pm$ 15.2<br>(0-60)  | 56.5 $\pm$ 54.3<br>(0-190)   |
| Normal haematology values in one day old foals [34]:           |                               |                                     |                                  |                                   |                                    |                                 |                                    |                            |                              |
| 12.0-16.6                                                      | 32-46                         | 8.2-11.0                            | 129-409                          | 4.9-11.7                          | 0.7-2.1                            | 70-390                          | 3.4-9.6                            | 0-20                       | 0-30                         |
| Serum biochemistry                                             |                               |                                     |                                  |                                   |                                    |                                 |                                    |                            |                              |
| Creatine<br>kinase<br>IU/L                                     | Total bilirubin<br>mg/dL      | Triglycerides<br>mg/dL              | Total protein<br>g/dL            | Albumin<br>g/dL                   | Albumin /<br>Globulin              | Blood urea<br>nitrogen<br>mg/dL | Creatinine<br>mg/dL                | Fibrinogen<br>g/L          | Serum<br>amyloid A<br>μg/dL  |
| group NE                                                       |                               |                                     |                                  |                                   |                                    |                                 |                                    |                            |                              |
| 300 $\pm$ 260<br>(132-1136)                                    | 2.5 $\pm$ 0.7<br>(1.3-3.6)    | 22 $\pm$ 18<br>(7-60)               | 4.2 $\pm$ 0.3<br>(3.4-4.5)       | 3.2 $\pm$ 0.3<br>(2.6-3.4)        | 3.5 $\pm$ 0.5<br>(2.7-4.2)         | 41 $\pm$ 11<br>(29-62)          | 3.6 $\pm$ 3.1<br>(1.1-13.1)        | 1.8 $\pm$ 0.4<br>(1.4-2.6) | 6 $\pm$ 7<br>(1-24)          |
| group exNE                                                     |                               |                                     |                                  |                                   |                                    |                                 |                                    |                            |                              |
| 5511 $\pm$ 11818<br>(92-51050)                                 | 4.0 $\pm$ 1.2<br>(2.0-6.1)    | 76 $\pm$ 82<br>(26-257)             | 4.5 $\pm$ 0.4<br>(3.8-5.1)       | 3.0 $\pm$ 0.3<br>(2.4-3.5)        | 2.3 $\pm$ 1.0<br>(1.3-4.6)         | 46 $\pm$ 15<br>(19-73)          | 4.0 $\pm$ 3.3<br>(0.7-14.8)        | 2.2 $\pm$ 0.5<br>(1.7-3.1) | 101 $\pm$ 170<br>(1-620)     |
| Normal serum biochemistry values in one day old foals [35,36]: |                               |                                     |                                  |                                   |                                    |                                 |                                    |                            |                              |
| 40-909                                                         | 1.3-4.5                       | 30-193                              | 4.3-8.1                          | 2.5-3.6                           |                                    | 9-40                            | 1.2-4.3                            | 1-4                        | 0-37                         |

| Electrolyte concentrations                                   |                           |                                 |                          |                         |                         |                        |                          |                            |                         |                       |  |
|--------------------------------------------------------------|---------------------------|---------------------------------|--------------------------|-------------------------|-------------------------|------------------------|--------------------------|----------------------------|-------------------------|-----------------------|--|
| Phosphorus                                                   |                           | Calcium                         |                          | Sodium                  |                         | Potassium              |                          | Chlorine                   |                         | Magnesium             |  |
| mg/dL                                                        |                           | mg/dL                           |                          | mg/dL                   |                         | mg/dL                  |                          | mg/dL                      |                         | mg/dL                 |  |
| group NE                                                     |                           |                                 |                          |                         |                         |                        |                          |                            |                         |                       |  |
| 8.7 ±3.8<br>(5.0-14.6)                                       |                           | 13.6 ±2.2<br>(9.2-15.7)         |                          | 143.8 ±2.6<br>(141-149) |                         | 5.2 ±0.9<br>(4.3-6.8)  |                          | 98.6 ±4.2<br>(92.3-102.6)  |                         | 2.1 ±0.2<br>(1.8-2.5) |  |
| group exNE                                                   |                           |                                 |                          |                         |                         |                        |                          |                            |                         |                       |  |
| 5.2 ±2.1<br>(4.0-9.8)                                        |                           | 11.9 ±0.6<br>(11.0-12.8)        |                          | 143.1 ±3.3<br>(139-147) |                         | 3.6 ±0.4<br>(3.1-4.0)  |                          | 99.3 ± 5.6<br>(90.0-105.1) |                         | 2.4 ±0.6<br>(1.4-3.9) |  |
| Normal electrolyte concentrations in one day old foals [35]: |                           |                                 |                          |                         |                         |                        |                          |                            |                         |                       |  |
| 3.8-7.4                                                      |                           | 9.7-13.7                        |                          | 123-159                 |                         | 3.6-5.6                |                          | 90-114                     |                         | 0.6-4.2               |  |
| Rapid determinations                                         |                           |                                 |                          |                         |                         |                        |                          |                            |                         |                       |  |
| Jugular vein glucose                                         |                           |                                 |                          | Umbilical vein lactate  |                         |                        |                          | Jugular vein lactate       |                         |                       |  |
| mg/dL                                                        |                           |                                 |                          | mmol/L                  |                         |                        |                          | mmol/L                     |                         |                       |  |
| group NE                                                     |                           |                                 |                          |                         |                         |                        |                          |                            |                         |                       |  |
| 92 ±17<br>(75-109)                                           |                           |                                 |                          | 3.5 ±0.7<br>(3.0-4.0)   |                         |                        |                          | 6.4 ±6.6<br>(2.7-22.5)     |                         |                       |  |
| group exNE                                                   |                           |                                 |                          |                         |                         |                        |                          |                            |                         |                       |  |
| 96 ±64<br>(32-160)                                           |                           |                                 |                          | /                       |                         |                        |                          | 9.1 ±7.0<br>(2.5-23.4)     |                         |                       |  |
| Normal determinations in foals at birth [35,37]:             |                           |                                 |                          |                         |                         |                        |                          |                            |                         |                       |  |
| 67-99                                                        |                           |                                 |                          | 3.2-4.7                 |                         |                        |                          | 2.3-5.0                    |                         |                       |  |
| Arterial blood gas analysis                                  |                           |                                 |                          |                         |                         |                        |                          |                            |                         |                       |  |
| pH                                                           | Oxygen partial pressure   | Carbon dioxide partial pressure | Oxygen saturation        | Potassium               | Sodium                  | Chlorine               | Anion gap                | Bicarbonate                | Acid base excess        |                       |  |
|                                                              | mmHg                      | mmHg                            | %                        | mmol/L                  | mmol/L                  | mmol/L                 | mmol/L                   | mmol/L                     | mmol/L                  | mmol/L                |  |
| group NE                                                     |                           |                                 |                          |                         |                         |                        |                          |                            |                         |                       |  |
| 7.37 ±0.04<br>(7.32-7.41)                                    | 48.0 ±10.9<br>(34.2-59.9) | 43.8 ±4.3<br>(39.4-47.7)        | 87.9 ±5.1<br>(82.7-93.9) | 3.6 ±0.5<br>(3.3-4.4)   | 140.3 ±1.3<br>(139-142) | 99.8 ±4.4<br>(95-104)  | 19.3 ±7.8<br>(9.8-28.7)  | 24.2 ±3.6<br>(20.2-28.2)   | -0.2 ±4.2<br>(-5.0-4.4) |                       |  |
| group exNE                                                   |                           |                                 |                          |                         |                         |                        |                          |                            |                         |                       |  |
| 7.36 ±0.04<br>(7.31-7.41)                                    | 66.3 ±17.5<br>(48.5-96.8) | 43.7 ±6.9<br>(36.6-54.1)        | 92.9 ±3.5<br>(87.4-97.2) | 2.9 ±0.1<br>(2.6-3.0)   | 141.4 ±4.3<br>(135-147) | 102.4 ±4.3<br>(93-107) | 17.9 ±3.7<br>(12.6-22.6) | 23.5 ±1.6<br>(21.7-26.4)   | -0.9 ±1.9<br>(-3.2-2.5) |                       |  |
| Normal arterial blood gas values in foals at birth [38]:     |                           |                                 |                          |                         |                         |                        |                          |                            |                         |                       |  |
| 7.36-7.44                                                    | 64.2-68.8                 | 46.0-49.4                       | 97-100                   | 3.6-5.6                 | 123-159                 | 90-114                 | 9.5-31.7                 | 24.1-25.9                  | -0.1-1.9                |                       |  |
